# Supplementary material for: Sparse canonical methods for biological data integration: application to a cross-platform study
Source: PubMed Central journal article supplement (PMC2640358; doi:10.1186/1471-2105-10-34), 2009-01-26
Supplement: 1471-2105-10-34-S1.pdf [file 1471-2105-10-34-S1.pdf]

## 1 PLS algorithm (canonical mode)

1.  $X_0 = X, Y_0 = Y$
2. For  $h = 1 \dots H$ :
  - (a) Initialize  
 $\xi_h = \text{first column of } X_{h-1} \quad \omega_h = \text{first column of } Y_{h-1}$
  - (b) Until convergence of  $a_h$ :
    - i.  $a_h = X'_{h-1}\xi_h/\xi'_h\xi_h$ , norm  $a_h$
    - ii.  $\xi_h = X_{h-1}a_h$ , norm  $\xi_h$
    - iii.  $b_h = Y'_{h-1}\xi_h/\xi'_h\xi_h$ , norm  $b_h$
    - iv.  $\omega_h = Y_{h-1}b_h$ , norm  $\omega_h$
  - (c)  $c_h = X'_{h-1}\xi_h \quad e_h = Y'_{h-1}\omega_h$
  - (d)  $X_h = X_{h-1} - \xi_h c'_h \quad Y_h = Y_{h-1} - \omega_h e'_h$

Step (c) computes the regression coefficients of the matrices  $X_{h-1}$  and  $Y_{h-1}$  on the latent variables  $\xi_h$  and  $\omega_h$ .

Step (d) computes the deflated (residual) matrices.

## 2 sparse PLS algorithm (canonical mode)

Sparse PLS initializes step (a) in PLS by extracting the first pair of singular vectors  $(a_h, b_h)$  of the crossproduct  $X'_{h-1}Y_{h-1}$ , which includes variation in both  $X$  and  $Y$  and the correlation between the two sets.

The two loading vectors  $(a_h, b_h)$  are then computed with penalizations  $\lambda_a$  and  $\lambda_b$  in step (b), and the latent vectors  $(\xi_h, \omega_h)$  are then computed, where  $g_\lambda(y) = \text{sign}(y)(|y| - \lambda)_+$  is the soft-thresholding penalty function.

1.  $X_0 = X \quad Y_0 = Y$
2. For  $h = 1 \dots H$ :
  - (a) Set  $\tilde{M}_{h-1} = X'_{h-1}Y_{h-1}$ , decompose  $\tilde{M}_{h-1}$  and extract the first pair of singular vectors  $a_{old} = a_h$  and  $b_{old} = b_h$
  - (b) Until convergence of  $a_{new}$  and  $b_{new}$ :
    - i.  $a_{new} = g_{\lambda_a}(\tilde{M}_{h-1}b_{old})$ , norm  $a_{new}$
    - ii.  $b_{new} = g_{\lambda_b}(\tilde{M}'_{h-1}a_{old})$ , norm  $b_{new}$
    - iii.  $a_{old} = a_{new}, b_{old} = b_{new}$
  - (c)  $\xi_h = X_{h-1}a_{new}$   
 $\omega_h = Y_{h-1}b_{new}$
  - (d)  $c_h = X'_{h-1}\xi_h \quad e_h = Y'_{h-1}\omega_h$
  - (e)  $X_h = X_{h-1} - \xi_h c'_h \quad Y_h = Y_{h-1} - \omega_h e'_h$

### 3 Canonical Correlation Analysis with Elastic Net penalization

CCA-EN initializes step (a) in PLS by setting  $\xi_h = X_{h-1}^j$  and  $\omega_h = Y_{h-1}^k$  such that  $\text{cor}(X_{h-1}^j, Y_{h-1}^k)$  is maximized, for  $j = 1 \dots p$  and  $k = 1 \dots q$ . Hence, this algorithm aims at maximizing the correlation (rather than the covariance for PLS and sPLS).

The approximation on Elastic Net penalization finally consists in introducing soft-thresholding penalizations, as in sparse PLS, which makes both algorithms similar, except for the initialization step.

1.  $X_0 = X \quad Y_0 = Y$
2. For  $h = 1 \dots H$ :
  - (a) Set  $\xi_h = X_{h-1}^j$  and  $\omega_h = Y_{h-1}^k$  such that  $\text{cor}(X_{h-1}^j, Y_{h-1}^k)$  is maximized  
 $a_{new} = X_{h-1}' \xi_h / \xi_h' \xi_h \quad b_{new} = Y_{h-1}' \omega_h / \omega_h' \omega_h$ , norm  $a_{new}$  and  $b_{new}$
  - (b) Until convergence of  $a_{new}$  and  $b_{new}$ :
    - i.  $a_{new} = g_{\lambda_a}(Y_{h-1} b_{old})$ , norm  $a_{new}$
    - ii.  $b_{new} = g_{\lambda_b}(X_{h-1} a_{old})$ , norm  $b_{new}$
    - iii.  $a_{old} = a_{new}, b_{old} = b_{new}$
  - (c)  $\xi_h = X_{h-1} a_{new}$ , norm  $\xi_h$   
 $\omega_h = Y_{h-1} b_{new}$  norm  $\omega_h$
  - (d)  $c_h = X_{h-1}' \xi_h \quad e_h = Y_{h-1}' \omega_h$
  - (e)  $X_h = X_{h-1} - \xi_h c_h' \quad Y_h = Y_{h-1} - \omega_h e_h'$
