# Supplementary material for: Sparse canonical methods for biological data integration: application to a cross-platform study
Source: Springer Nature journal article supplement (doi:10.1186/1471-2105-10-34), 2009-01-26

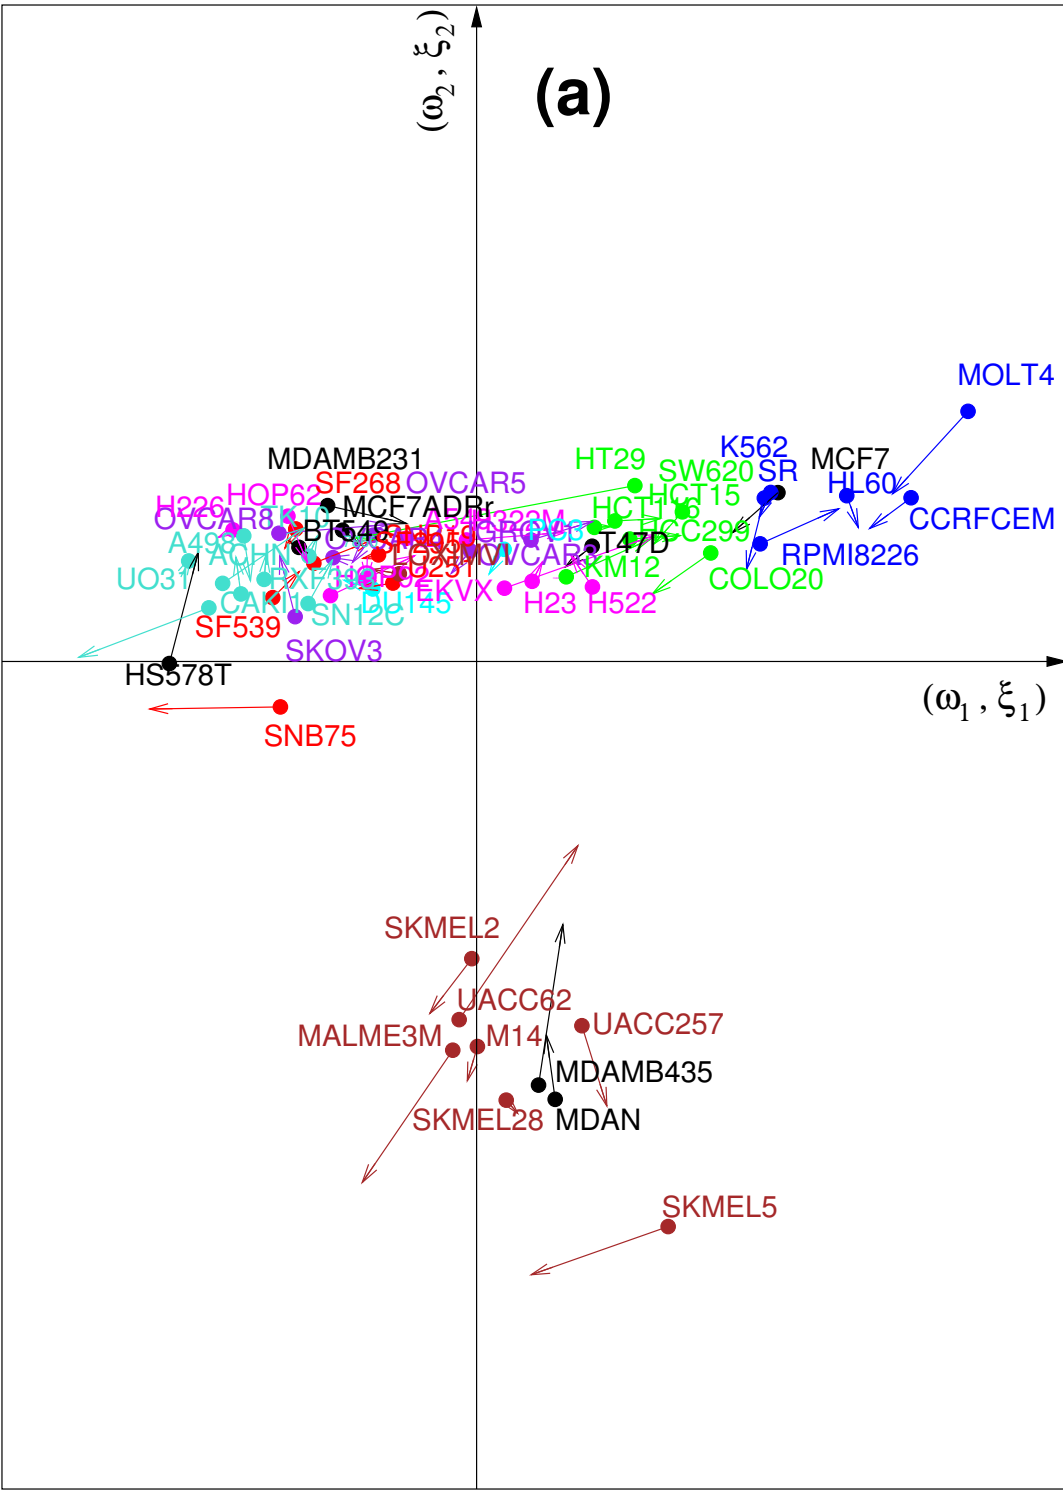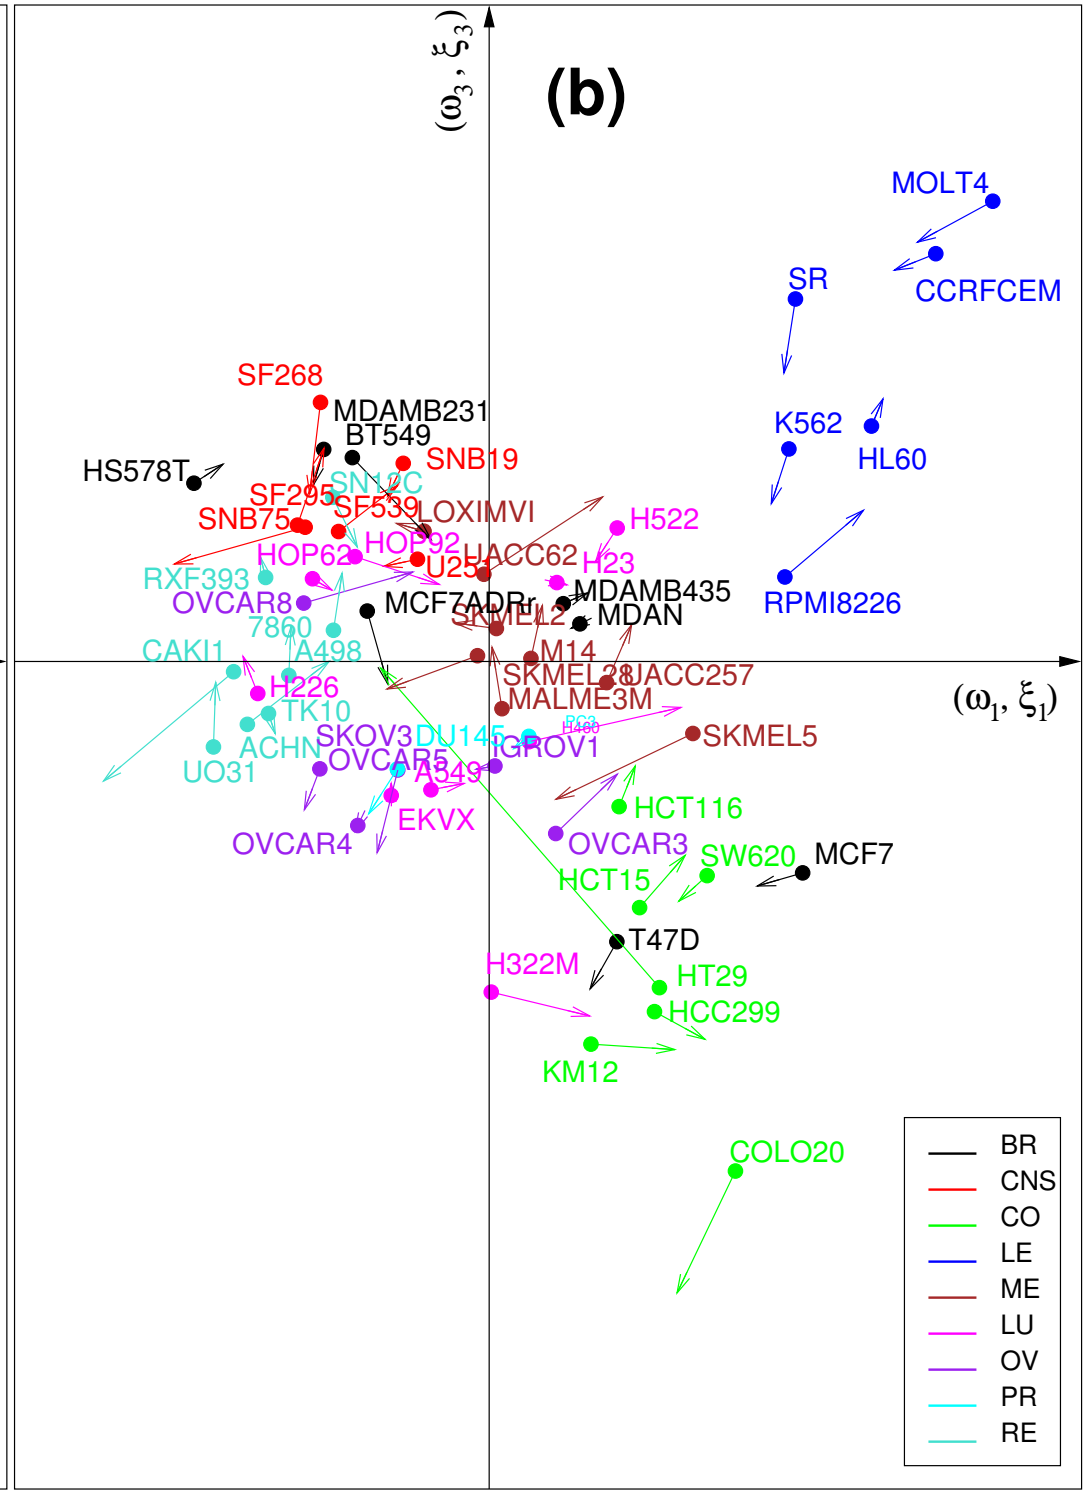

Supplement: 12859_2008_2764_MOESM12_ESM.pdf [file 12859_2008_2764_MOESM12_ESM.pdf]
