# Supplementary material for: Sparse canonical methods for biological data integration: application to a cross-platform study
Source: Springer Nature journal article supplement (doi:10.1186/1471-2105-10-34), 2009-01-26
Supplement: 12859_2008_2764_MOESM15_ESM.pdf [file 12859_2008_2764_MOESM15_ESM.pdf]

### Ross-cDNA

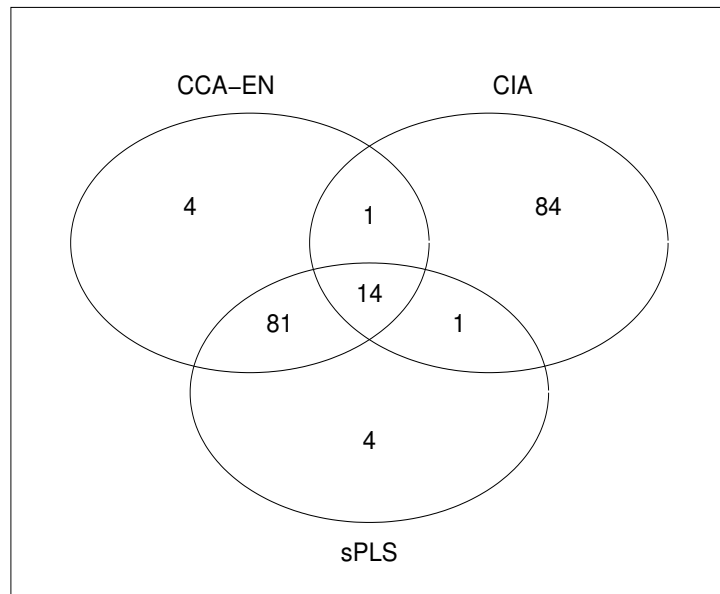

Ross-cDNA

Ross-cDNA

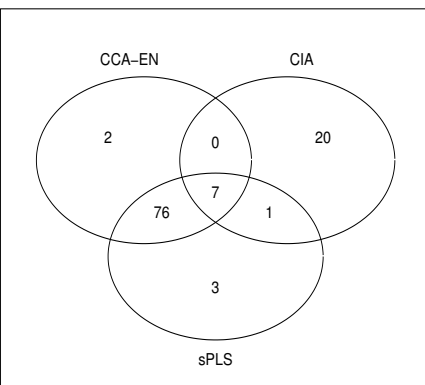

+

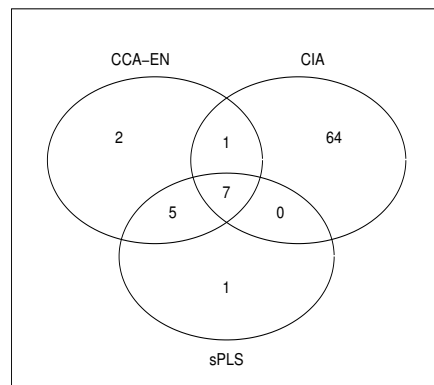

Over-expressed in melanoma cell lines

Under-expressed in melanoma cell lines

### Staunton-Affymetrix

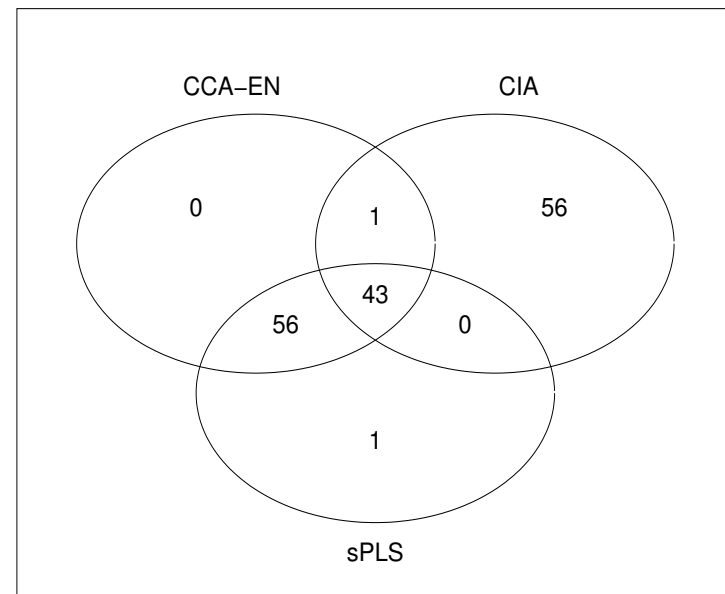

Staunton-Affymetrix

Staunton-Affymetrix

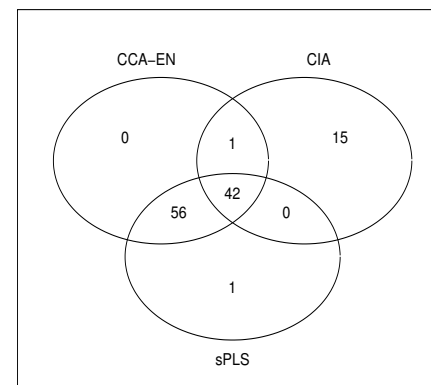

+

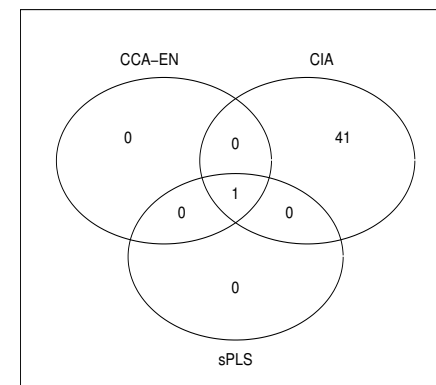

Over-expressed in melanoma cell lines

Under-expressed in melanoma cell lines
